# Supplementary material for: Role of the interferons in CD64 and CD169 expressions in whole blood: Relevance in the balance between viral‐ or bacterial‐oriented immune responses
Source: PubMed Central journal article supplement (PMC7016842; doi:10.1002/iid3.289), 2020-02-07
Supplement: IID3-8-106-s001.pdf [file IID3-8-106-s001.pdf]

**SUPPORTING INFORMATION.**

**Supplementary Table 1. Detailed values of CD169 and CD64 expressions after blood stimulation.** Whole blood of 3 donors was co-incubated for 3 (A1 and B1), 5 (A2 and B2), 7 (A3 and B3) or 24 (A4 and B4) hours at 37°C with either no activator (Non Act), or interleukins (IL-2, IL-6, IL-12, IL-18, IL-12+IL-18) or infectious extracts (Poly IC, LPS) or interferons (IFN $\alpha$ 1, IFN $\gamma$ ). Extracellular staining of the activated blood was performed with the CD64-CD169/Infections antibody mixture. Results are expressed as means  $\pm$  standard deviations (stdev) of Median of Fluorescence Intensities (MFI) of CD169 on monocytes (mCD169) (supplementary tables 1A) and of CD64 on neutrophils (nCD64) (supplementary tables 1B). Comparison was made using a Dunnett's control test, with the Non Act condition used as control, and p-value was considered statistically significant under 0.05 (in bold with \*).

| <b>(A1) mCD169 MFI - 3h</b>     |                |               |               |               |               |                      |                |                |                               |                               |
|---------------------------------|----------------|---------------|---------------|---------------|---------------|----------------------|----------------|----------------|-------------------------------|-------------------------------|
| <b>Activator</b>                | <b>Non Act</b> | <b>IL-2</b>   | <b>IL-6</b>   | <b>IL-12</b>  | <b>IL-18</b>  | <b>IL-12 + IL-18</b> | <b>Poly IC</b> | <b>LPS</b>     | <b>IFN<math>\alpha</math></b> | <b>IFN<math>\gamma</math></b> |
| <b>Mean</b>                     | 0,89           | 0,92          | 0,86          | 0,87          | 0,90          | 0,83                 | 0,83           | 1,15           | 0,92                          | 0,89                          |
| <b>(<math>\pm</math> stdev)</b> | ( $\pm$ 0,05)  | ( $\pm$ 0,06) | ( $\pm$ 0,03) | ( $\pm$ 0,01) | ( $\pm$ 0,12) | ( $\pm$ 0,03)        | ( $\pm$ 0,07)  | ( $\pm$ 0,05)  | ( $\pm$ 0,02)                 | ( $\pm$ 0,07)                 |
| <b>Dunett p-value</b>           | /              | 0,9985        | 0,9855        | 0,9978        | 1             | 0,7791               | 0,6947         | <b>0,0004*</b> | 0,999                         | 1                             |
| <b>(A2) mCD169 MFI - 5h</b>     |                |               |               |               |               |                      |                |                |                               |                               |
| <b>Activator</b>                | <b>Non Act</b> | <b>IL-2</b>   | <b>IL-6</b>   | <b>IL-12</b>  | <b>IL-18</b>  | <b>IL-12 + IL-18</b> | <b>Poly IC</b> | <b>LPS</b>     | <b>IFN<math>\alpha</math></b> | <b>IFN<math>\gamma</math></b> |
| <b>Mean</b>                     | 0,89           | 0,94          | 0,81          | 0,71          | 0,88          | 0,88                 | 0,90           | 1,16           | 1,15                          | 0,90                          |
| <b>(<math>\pm</math> stdev)</b> | ( $\pm$ 0,05)  | ( $\pm$ 0,01) | ( $\pm$ 0,13) | ( $\pm$ 0,28) | ( $\pm$ 0,09) | ( $\pm$ 0,1)         | ( $\pm$ 0,09)  | ( $\pm$ 0,17)  | ( $\pm$ 0,24)                 | ( $\pm$ 0,13)                 |
| <b>Dunett p-value</b>           | /              | 0,9998        | 0,9771        | 0,6049        | 1             | 1                    | 1              | 0,1467         | 0,1872                        | 1                             |
| <b>(A3) mCD169 MFI - 7h</b>     |                |               |               |               |               |                      |                |                |                               |                               |
| <b>Activator</b>                | <b>Non Act</b> | <b>IL-2</b>   | <b>IL-6</b>   | <b>IL-12</b>  | <b>IL-18</b>  | <b>IL-12 + IL-18</b> | <b>Poly IC</b> | <b>LPS</b>     | <b>IFN<math>\alpha</math></b> | <b>IFN<math>\gamma</math></b> |
| <b>Mean</b>                     | 0,89           | 1,30          | 1,07          | 0,97          | 1,04          | 1,00                 | 1,25           | 1,39           | 1,81                          | 1,12                          |
| <b>(<math>\pm</math> stdev)</b> | ( $\pm$ 0,05)  | ( $\pm$ 0,09) | ( $\pm$ 0,18) | ( $\pm$ 0,13) | ( $\pm$ 0,09) | ( $\pm$ 0,1)         | ( $\pm$ 0,1)   | ( $\pm$ 0,26)  | ( $\pm$ 0,57)                 | ( $\pm$ 0,11)                 |
| <b>Dunett p-value</b>           | /              | 0,2011        | 0,9219        | 0,9999        | 0,9674        | 0,9964               | 0,3324         | 0,0857         | <b>0,0006*</b>                | 0,7634                        |

**(A4) mCD169 MFI - 24h**

| Activator                     | Non Act               | IL-2                 | IL-6                  | IL-12                 | IL-18                 | IL-12 + IL-18         | Poly IC               | LPS                   | IFN $\alpha$          | IFN $\gamma$          |
|-------------------------------|-----------------------|----------------------|-----------------------|-----------------------|-----------------------|-----------------------|-----------------------|-----------------------|-----------------------|-----------------------|
| <b>Mean</b><br>( $\pm$ stdev) | 0,89<br>( $\pm$ 0,05) | 0,90<br>( $\pm$ 0,1) | 1,08<br>( $\pm$ 0,22) | 1,05<br>( $\pm$ 0,09) | 0,92<br>( $\pm$ 0,08) | 0,99<br>( $\pm$ 0,24) | 1,43<br>( $\pm$ 0,38) | 0,76<br>( $\pm$ 0,16) | 2,37<br>( $\pm$ 1,44) | 0,79<br>( $\pm$ 0,15) |
| <b>Dunett p-value</b>         | /                     | 1                    | 0,9991                | 1                     | 1                     | 1                     | 0,6989                | 1                     | <b>0,0103*</b>        | 1                     |

**(B1) nCD64 MFI - 3h**

| Activator                     | Non Act               | IL-2                  | IL-6                  | IL-12                 | IL-18                 | IL-12 + IL-18         | Poly IC               | LPS                   | IFN $\alpha$          | IFN $\gamma$          |
|-------------------------------|-----------------------|-----------------------|-----------------------|-----------------------|-----------------------|-----------------------|-----------------------|-----------------------|-----------------------|-----------------------|
| <b>Mean</b><br>( $\pm$ stdev) | 0,96<br>( $\pm$ 0,09) | 0,96<br>( $\pm$ 0,12) | 0,96<br>( $\pm$ 0,09) | 0,97<br>( $\pm$ 0,13) | 0,96<br>( $\pm$ 0,13) | 0,96<br>( $\pm$ 0,12) | 0,95<br>( $\pm$ 0,13) | 1,29<br>( $\pm$ 0,14) | 0,99<br>( $\pm$ 0,13) | 0,98<br>( $\pm$ 0,17) |
| <b>Dunett p-value</b>         | /                     | 1                     | 1                     | 1                     | 1                     | 1                     | 1                     | <b>0,0264*</b>        | 0,9999                | 1                     |

**(B2) nCD64 MFI - 5h**

| Activator                     | Non Act               | IL-2                  | IL-6                  | IL-12                | IL-18                 | IL-12 + IL-18         | Poly IC               | LPS                   | IFN $\alpha$         | IFN $\gamma$          |
|-------------------------------|-----------------------|-----------------------|-----------------------|----------------------|-----------------------|-----------------------|-----------------------|-----------------------|----------------------|-----------------------|
| <b>Mean</b><br>( $\pm$ stdev) | 0,96<br>( $\pm$ 0,09) | 0,98<br>( $\pm$ 0,12) | 0,92<br>( $\pm$ 0,11) | 0,87<br>( $\pm$ 0,1) | 0,98<br>( $\pm$ 0,15) | 1,01<br>( $\pm$ 0,15) | 0,96<br>( $\pm$ 0,16) | 1,29<br>( $\pm$ 0,22) | 1,10<br>( $\pm$ 0,2) | 1,33<br>( $\pm$ 0,18) |
| <b>Dunett p-value</b>         | /                     | 1                     | 0,9999                | 0,9942               | 1                     | 0,9997                | 1                     | 0,0841                | 0,8208               | <b>0,0437*</b>        |

**(B3) nCD64 MFI - 7h**

| Activator                     | Non Act               | IL-2                  | IL-6                  | IL-12                 | IL-18                | IL-12 + IL-18         | Poly IC            | LPS                   | IFN $\alpha$         | IFN $\gamma$          |
|-------------------------------|-----------------------|-----------------------|-----------------------|-----------------------|----------------------|-----------------------|--------------------|-----------------------|----------------------|-----------------------|
| <b>Mean</b><br>( $\pm$ stdev) | 0,96<br>( $\pm$ 0,09) | 1,08<br>( $\pm$ 0,14) | 0,99<br>( $\pm$ 0,04) | 0,98<br>( $\pm$ 0,04) | 1,05<br>( $\pm$ 0,1) | 1,31<br>( $\pm$ 0,16) | 1,04<br>( $\pm$ 0) | 1,34<br>( $\pm$ 0,04) | 1,29<br>( $\pm$ 0,2) | 1,86<br>( $\pm$ 0,41) |
| <b>Dunett p-value</b>         | /                     | 0,9515                | 1                     | 1                     | 0,991                | 0,1228                | 0,9962             | 0,0725                | 0,1597               | <b>&lt; 0,0001*</b>   |

**(B4) nCD64 MFI - 24h**

| Activator                     | Non Act               | IL-2                 | IL-6                  | IL-12                 | IL-18                 | IL-12 + IL-18        | Poly IC               | LPS                   | IFN $\alpha$          | IFN $\gamma$          |
|-------------------------------|-----------------------|----------------------|-----------------------|-----------------------|-----------------------|----------------------|-----------------------|-----------------------|-----------------------|-----------------------|
| <b>Mean</b><br>( $\pm$ stdev) | 0,96<br>( $\pm$ 0,09) | 1,61<br>( $\pm$ 0,2) | 0,97<br>( $\pm$ 0,18) | 1,17<br>( $\pm$ 0,02) | 1,33<br>( $\pm$ 0,55) | 2,17<br>( $\pm$ 1,9) | 1,06<br>( $\pm$ 0,24) | 1,39<br>( $\pm$ 0,47) | 1,28<br>( $\pm$ 0,55) | 2,40<br>( $\pm$ 1,73) |
| <b>Dunett p-value</b>         | /                     | 0,9364               | 1                     | 1                     | 0,998                 | 0,4562               | 1                     | 0,9941                | 0,9993                | 0,2798                |

**SUPPORTING INFORMATION.**

**Healthy fresh blood**

(A) Large gating

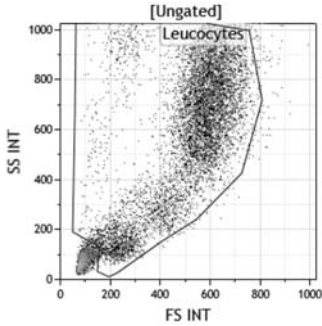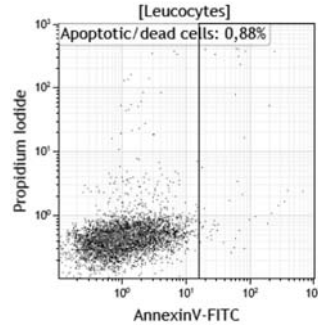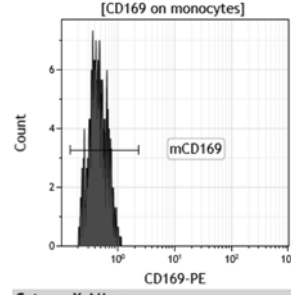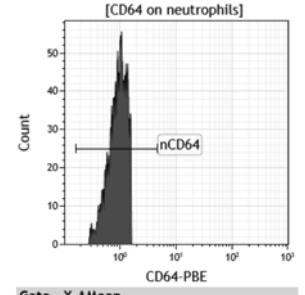

(B) Restricted gating

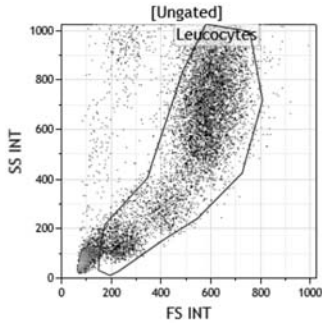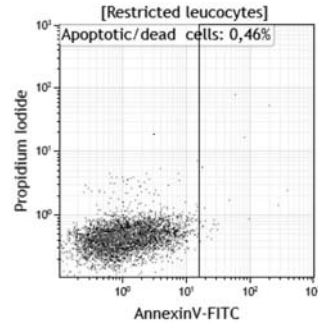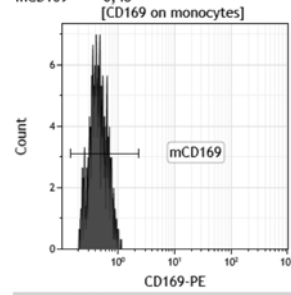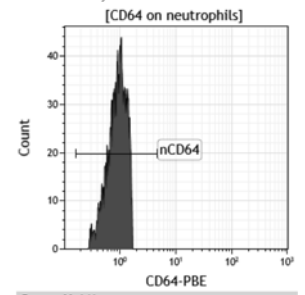

**Healthy incubated blood**

(A) Large gating

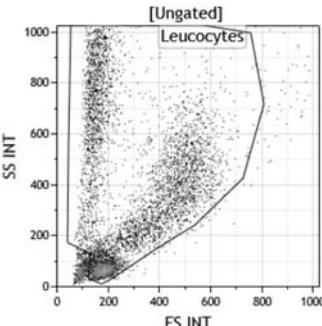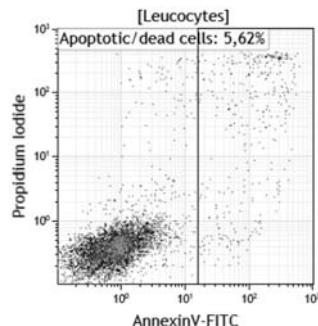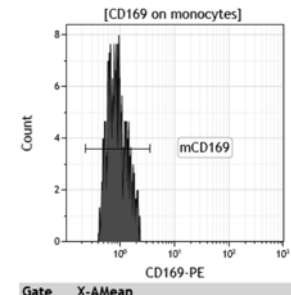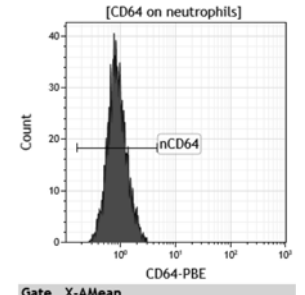

(B) Restricted gating

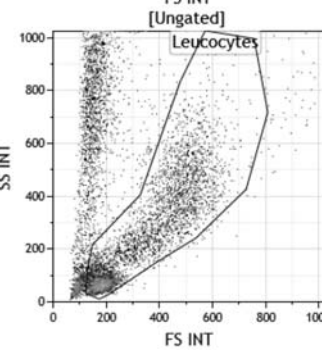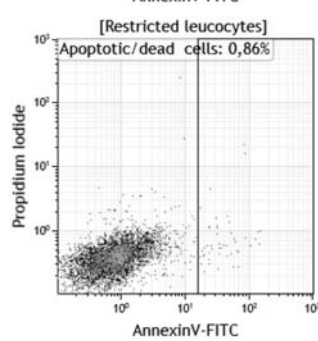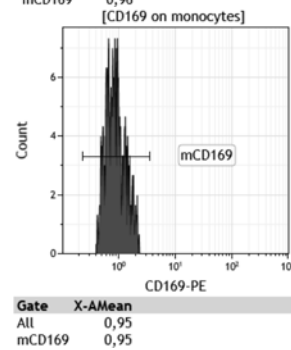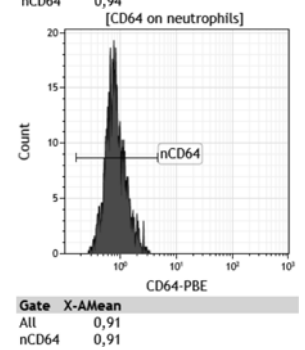

IFN $\alpha$ -incubated blood

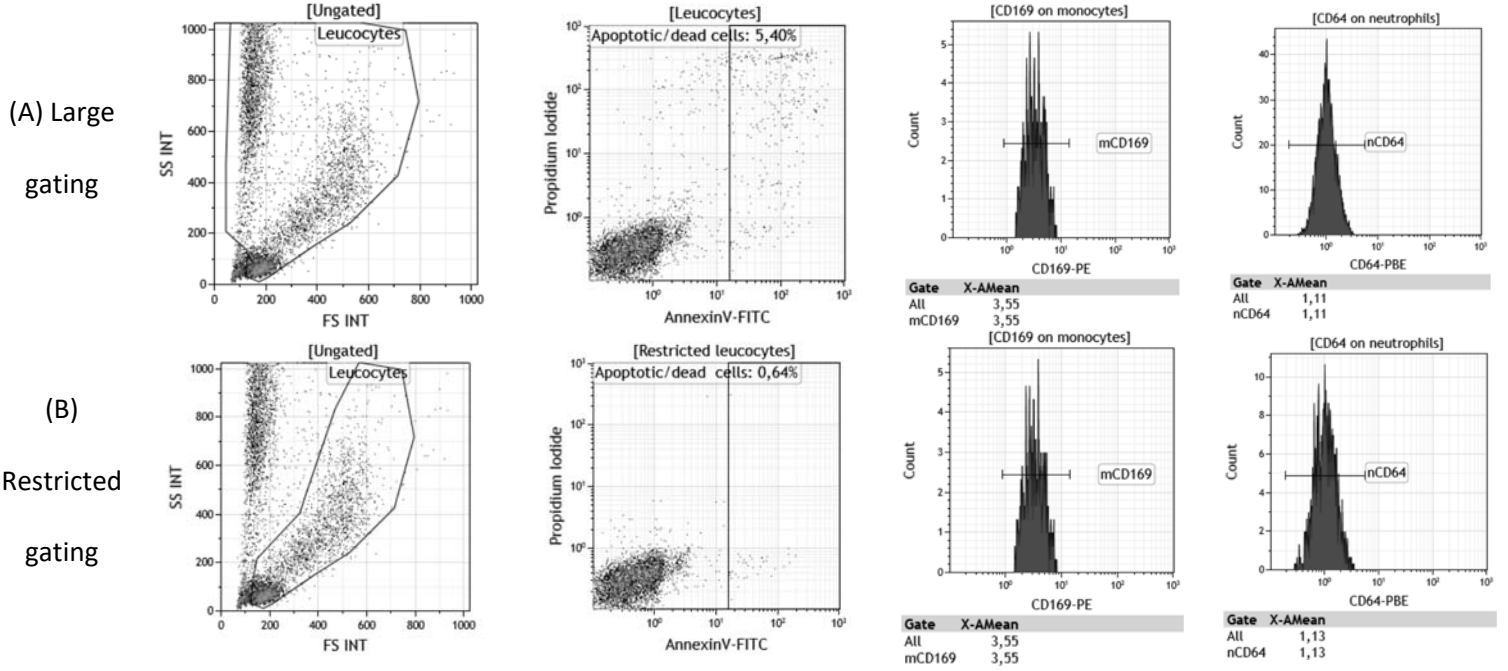

IFN $\gamma$ -incubated blood

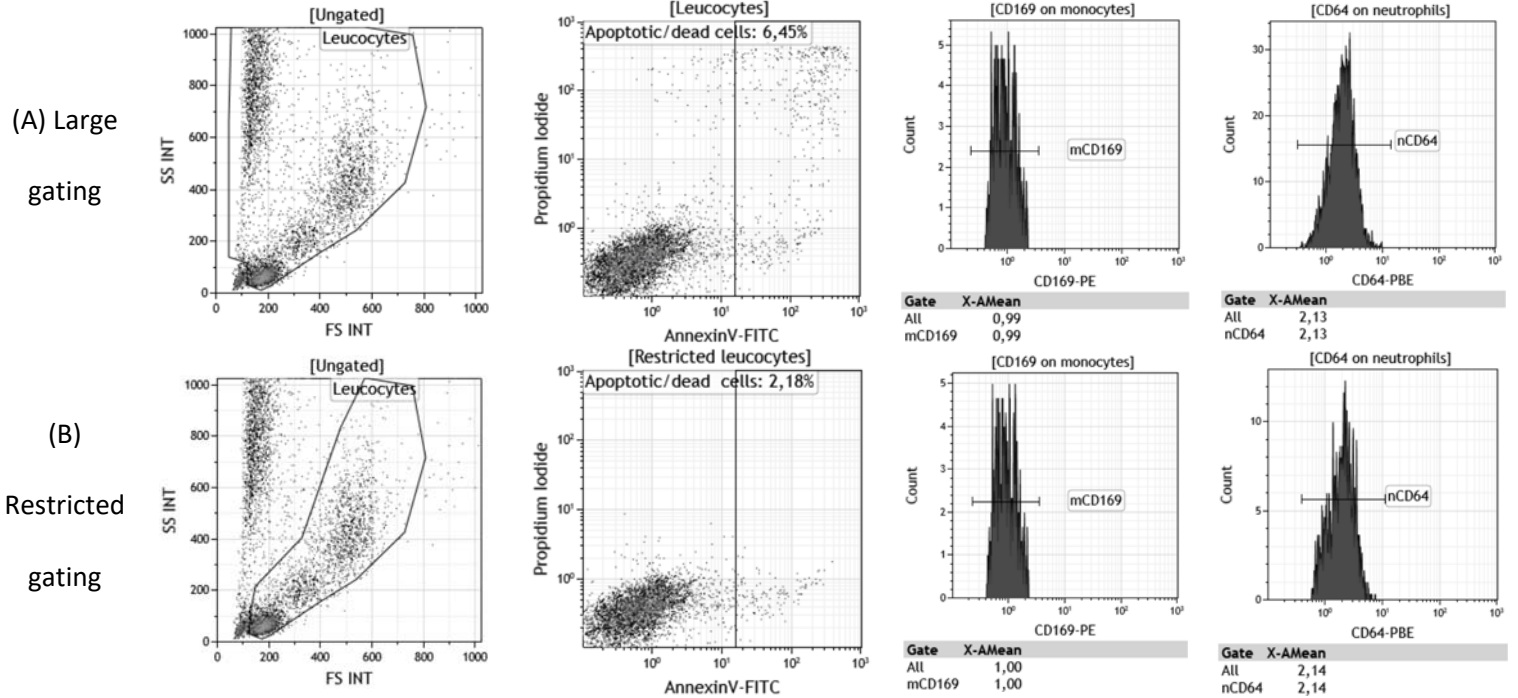

**Supplementary Figure 1. Apoptosis impact on CD169 and CD64.** *Whole blood of 1 donor was tested fresh (healthy fresh blood) or co-incubated for 24 hours at 37°C with either no activator (healthy incubated blood) or type I interferon (IFN $\alpha$ -incubated blood) or type II interferon (IFN $\gamma$ -incubated blood). Extracellular staining of all samples was performed either with Annexin V-FITC plus Propidium Iodide (PI) or with the CD64-CD169/Infections antibody mixture. Leucocytes were selected on their typical forward (FS) and side (SS) scatter, largely including all cells (large gating; supplementary figures 1A) or narrowly selecting only cells with high FS (restricted gating; supplementary figures 1B).*

Results show that, when tested fresh, whole blood from a healthy donor has less than 1% of apoptotic (Annexin V+ PI-) or dead (Annexin V+ PI+) cells, whatever the leucocyte gating, with expressions of mCD169 and nCD64 about 0.5 and 0.9, respectively.

When this same sample is incubated 24 hours at 37°C with no activator or IFN I or IFN II, about 5-6% of apoptotic or dead cells appear when considering all cells. However, when using a restricted gating strategy, only 1-2% of apoptotic or dead cells remain for all incubated samples.

Results indicate that using a restricted gating strategy prevents including most apoptotic or dead cells in the analysis. Further, taking this precaution has no impact on the two biomarker levels: mCD169 is about 1.0, 3.6 and 1.0 in a non-activated, an IFN I-activated and an IFN II-activated blood, respectively, whatever the gating strategy, while nCD64 is about 0.9, 1.1 and 2.1 in a non-activated, an IFN I-activated and an IFN II-activated blood, respectively, whatever the gating strategy.

**SUPPORTING INFORMATION.**

**Supplementary Table 2. Detailed values of CD169 and CD64 expressions after interferon stimulation.** Whole blood of 4 donors was co-incubated for 15 hours at 37°C with either no interferon (Non Act), or type I interferons (IFN $\alpha$ 1, IFN $\alpha$ 2, IFN $\alpha$ 3, IFN $\alpha$ 4, IFN $\alpha$ 5, IFN $\alpha$ 6, IFN $\alpha$ 7, IFN $\alpha$ 8, IFN $\alpha$ 9, IFN $\alpha$ 10, IFN $\alpha$ 11, IFN $\alpha$ 12, IFN $\beta$ , IFN $\omega$ ) or type II interferon (IFN $\gamma$ ). Extracellular staining of the activated blood was performed with the CD64-CD169/Infections antibody mixture. Results are expressed as means  $\pm$  standard deviations (stdev) of Median of Fluorescence Intensities (MFI) of CD169 on monocytes (mCD169) (supplementary table 2A) and of CD64 on neutrophils (nCD64) (supplementary table 2B). Comparison was made using a Dunnett's control test, with the Non Act condition used as control, and p-value was considered statistically significant under 0.05 (in bold with \*).

| (A) mCD169 MFI                                 |                     |                     |                     |                     |                     |                     |                     |                     |
|------------------------------------------------|---------------------|---------------------|---------------------|---------------------|---------------------|---------------------|---------------------|---------------------|
| Activator                                      | Non Act             | IFN $\alpha$ 1      | IFN $\alpha$ 2      | IFN $\alpha$ 3      | IFN $\alpha$ 4      | IFN $\alpha$ 5      | IFN $\alpha$ 6      | IFN $\alpha$ 7      |
| <b>Mean</b><br><b>(<math>\pm</math> stdev)</b> | 1,7<br>( $\pm$ 0,5) | 8,7<br>( $\pm$ 1,9) | 7,7<br>( $\pm$ 0,9) | 8,3<br>( $\pm$ 1,3) | 8,4<br>( $\pm$ 1,1) | 7,8<br>( $\pm$ 1)   | 8,2<br>( $\pm$ 1,1) | 10,2<br>( $\pm$ 1)  |
| <b>Dunnett p-value</b>                         | /                   | <b>&lt; 0,0001*</b> | <b>&lt; 0,0001*</b> | <b>&lt; 0,0001*</b> | <b>&lt; 0,0001*</b> | <b>&lt; 0,0001*</b> | <b>&lt; 0,0001*</b> | <b>&lt; 0,0001*</b> |

  

| (A) mCD169 MFI                                 |                     |                     |                     |                     |                     |                     |                     |                     |
|------------------------------------------------|---------------------|---------------------|---------------------|---------------------|---------------------|---------------------|---------------------|---------------------|
| Activator                                      | IFN $\alpha$ 8      | IFN $\alpha$ 9      | IFN $\alpha$ 10     | IFN $\alpha$ 11     | IFN $\alpha$ 12     | IFN $\beta$         | IFN $\omega$        | IFN $\gamma$        |
| <b>Mean</b><br><b>(<math>\pm</math> stdev)</b> | 9,6<br>( $\pm$ 0,9) | 9,4<br>( $\pm$ 1,4) | 9,7<br>( $\pm$ 1,3) | 6,6<br>( $\pm$ 0,4) | 7,8<br>( $\pm$ 0,9) | 7,8<br>( $\pm$ 0,6) | 9,6<br>( $\pm$ 1,9) | 3,3<br>( $\pm$ 1,5) |
| <b>Dunnett p-value</b>                         | <b>&lt; 0,0001*</b> | <b>&lt; 0,0001*</b> | <b>&lt; 0,0001*</b> | <b>0,0005*</b>      | <b>0,0042*</b>      | <b>&lt; 0,0001*</b> | <b>&lt; 0,0001*</b> | 0,1979              |

(B) nCD64 MFI

| Activator              | Non Act             | IFN $\alpha$ 1      | IFN $\alpha$ 2      | IFN $\alpha$ 3      | IFN $\alpha$ 4      | IFN $\alpha$ 5      | IFN $\alpha$ 6      | IFN $\alpha$ 7      |
|------------------------|---------------------|---------------------|---------------------|---------------------|---------------------|---------------------|---------------------|---------------------|
| Mean<br>( $\pm$ stdev) | 1,1<br>( $\pm$ 0,3) | 1,7<br>( $\pm$ 0,5) | 1,6<br>( $\pm$ 0,5) | 1,6<br>( $\pm$ 0,5) | 1,6<br>( $\pm$ 0,5) | 1,6<br>( $\pm$ 0,5) | 1,6<br>( $\pm$ 0,6) | 1,7<br>( $\pm$ 0,5) |
| Dunnett p-value        | /                   | 0,8185              | 0,8897              | 0,8743              | 0,9318              | 0,9199              | 0,9384              | 0,7835              |

(B) nCD64 MFI

| Activator              | IFN $\alpha$ 8      | IFN $\alpha$ 9      | IFN $\alpha$ 10     | IFN $\alpha$ 11     | IFN $\alpha$ 12     | IFN $\beta$         | IFN $\omega$        | IFN $\gamma$        |
|------------------------|---------------------|---------------------|---------------------|---------------------|---------------------|---------------------|---------------------|---------------------|
| Mean<br>( $\pm$ stdev) | 1,7<br>( $\pm$ 0,6) | 1,7<br>( $\pm$ 0,6) | 1,8<br>( $\pm$ 0,6) | 1,5<br>( $\pm$ 0,6) | 1,7<br>( $\pm$ 0,7) | 1,7<br>( $\pm$ 0,5) | 1,7<br>( $\pm$ 0,6) | 2,9<br>( $\pm$ 0,8) |
| Dunnett p-value        | 0,6995              | 0,7549              | 0,5375              | 0,9882              | 1,0000              | 0,8147              | 0,6821              | <b>0,0008*</b>      |

## SUPPORTING INFORMATION.

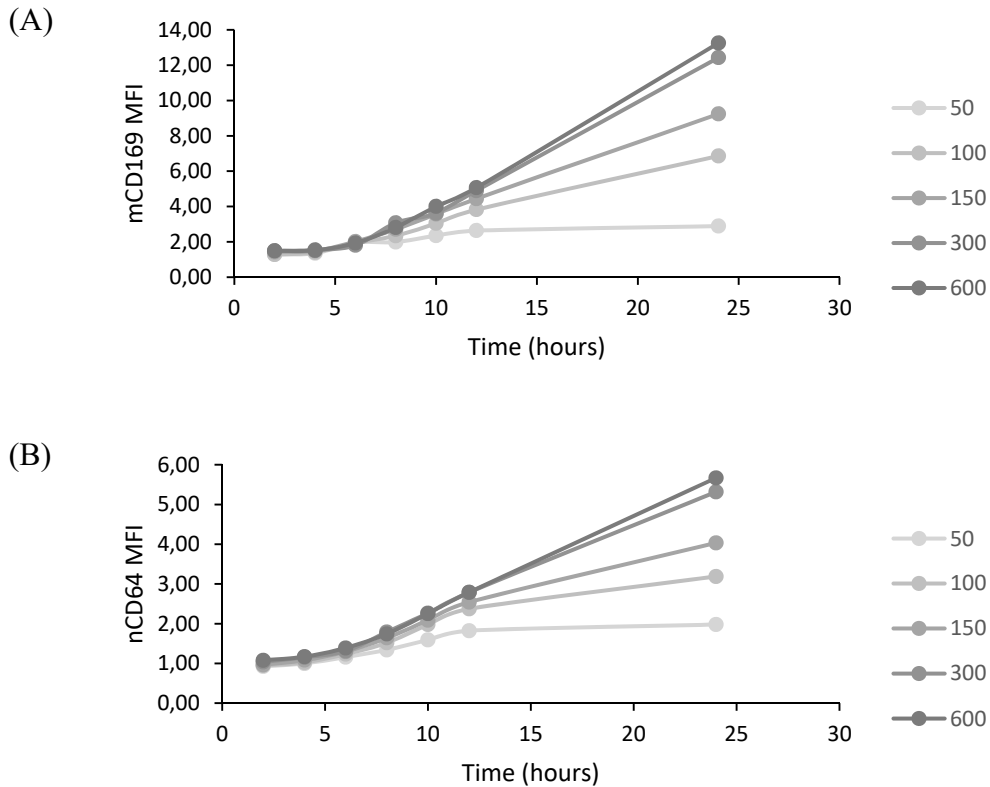

**Supplementary Figure 2. CD169 and CD64 expressions in different interferon-activated blood volumes.** Whole blood varying from 50  $\mu\text{L}$  to 600  $\mu\text{L}$  (light to dark grey) of 2 donors was co-incubated for 2 to 24 hours at 37°C with either one type I interferon ( $\text{IFN}\alpha 1$ ) or one type II interferon ( $\text{IFN}\gamma$ ). Extracellular staining of all activated blood volumes was performed with the CD64-CD169/Infections antibody mixture. Results were expressed as averages of Median of Fluorescence Intensities (MFI) of CD169 on monocytes (mCD169) when blood volumes were activated with  $\text{IFN}\alpha 1$  (figure 3A) and of CD64 on neutrophils (nCD64) when blood volumes were activated with  $\text{IFN}\gamma$  (figure 3B). Comparison was made using an ANOVA test, for which p-value is considered statistically significant under 0.05. When p-value was under 0.05, comparison has been made using a paired Tukey test, for which p-value is also considered statistically significant under 0.05.



Results of the ANOVA test show that up to 8 hours of incubation with IFN $\alpha$ 1, blood volume has no significant impact on mCD169 level (2h – p: 0.4733; 4h – p: 0.6690; 6h – p: 0.4443; 8h – p: 0.0502). However, after 10 hours of incubation, blood volumes give significantly different mCD169 levels (10h – p: 0.0004; 12h – p: 0.0024; 24h – p: 0.0004), meaning that long incubations with interferon implies to be careful with blood volume used for activation.

Results of the paired Tukey test (p-values not detailed) show that after 10 or 12 hours of incubation, 150, 300 and 600  $\mu$ L are blood volumes significantly giving higher mCD169 levels than 50 or 100  $\mu$ L, but equivalent between them. After 24 hours, 300 and 600  $\mu$ L of blood have significant impact on mCD169 level. All these results converge to demonstrate that a minimal initial blood volume of 300  $\mu$ L is required when mCD169 is assessed in whole blood activated by IFN $\alpha$ 1.

In the same way, results of the ANOVA test show that up to 6 hours of incubation with IFN $\gamma$ , blood volume has no significant impact on nCD64 level (2h – p: 0.2100; 4h – p: 0.2036; 6h – p: 0.1493). However, after 8 hours of incubation, blood volumes give significantly different nCD64 levels (8h – p: 0.0046; 10h – p: 0.0088; 12h – p: 0.0047; 24h – p: 0.0027), with results of the paired Tukey test (not detailed) showing that 150  $\mu$ L of initial blood volume is the minimum required for assessing nCD64 in whole blood activated by IFN $\gamma$ .

**SUPPORTING INFORMATION.**

**Supplementary Table 3. Detailed values of CD169 and CD64 kinetics after interferon stimulation.** Whole blood of 4 donors was co-incubated for 2 to 12 hours at 37°C with either no interferon (Non Act), or one type II interferon (IFN $\gamma$ ) or one type I interferon (IFN $\alpha$ 1). Extracellular staining of the activated blood was performed with the CD64-CD169/Infections antibody mixture. Results were expressed as means  $\pm$  standard deviations (stdev) of Median of Fluorescence Intensities (MFI) of CD169 on monocytes (mCD169) (supplementary table 3A1) and of CD64 on neutrophils (nCD64) (supplementary table 3B1). Comparison was made using an ANOVA test, for which p-value was considered statistically significant under 0.05 (in bold with \*). When p-value was under 0.05, detailed comparison between each hours was made for mCD169 (supplementary table A2) and nCD64 (supplementary table B2), using a paired Tukey test, for which p-value was also considered statistically significant under 0.05 (in bold with \*).

| <b>(A1) mCD169 MFI</b>                                          |                       |                       |                       |                       |                       |                       |                      |
|-----------------------------------------------------------------|-----------------------|-----------------------|-----------------------|-----------------------|-----------------------|-----------------------|----------------------|
| <b>Time (h)</b>                                                 | <b>2</b>              | <b>4</b>              | <b>6</b>              | <b>8</b>              | <b>10</b>             | <b>12</b>             | <b>ANOVA p-value</b> |
| <b>Non Act Mean<br/>(<math>\pm</math> stdev)</b>                | 1,45<br>( $\pm$ 0,13) | 1,40<br>( $\pm$ 0,17) | 1,37<br>( $\pm$ 0,14) | 1,31<br>( $\pm$ 0,10) | 1,40<br>( $\pm$ 0,05) | 1,58<br>( $\pm$ 0,15) | 0,1299               |
| <b>IFN<math>\gamma</math> Mean<br/>(<math>\pm</math> stdev)</b> | 1,44<br>( $\pm$ 0,19) | 1,31<br>( $\pm$ 0,13) | 1,33<br>( $\pm$ 0,16) | 1,33<br>( $\pm$ 0,14) | 1,48<br>( $\pm$ 0,15) | 1,58<br>( $\pm$ 0,18) | 0,1706               |
| <b>IFN<math>\alpha</math> Mean<br/>(<math>\pm</math> stdev)</b> | 1,49<br>( $\pm$ 0,14) | 1,53<br>( $\pm$ 0,18) | 1,87<br>( $\pm$ 0,12) | 2,94<br>( $\pm$ 0,35) | 3,81<br>( $\pm$ 0,25) | 4,98<br>( $\pm$ 0,18) | <b>&lt; 0,0001*</b>  |

(A2) mCD169 MFI

---

| IFN $\alpha$ Tukey p-value | 2         | 4         | 6         | 8         | 10        | 12        |
|----------------------------|-----------|-----------|-----------|-----------|-----------|-----------|
| 2                          | /         | 0,9997    | 0,1806    | < 0,0001* | < 0,0001* | < 0,0001* |
| 4                          | 0,9997    | /         | 0,2815    | < 0,0001* | < 0,0001* | < 0,0001* |
| 6                          | 0,1806    | 0,2815    | /         | < 0,0001* | < 0,0001* | < 0,0001* |
| 8                          | < 0,0001* | < 0,0001* | < 0,0001* | /         | 0,0003*   | < 0,0001* |
| 10                         | < 0,0001* | < 0,0001* | < 0,0001* | 0,0003*   | /         | < 0,0001* |
| 12                         | < 0,0001* | < 0,0001* | < 0,0001* | < 0,0001* | < 0,0001* | /         |

(B1) nCD64 MFI

---

| Time (h)                            | 2                     | 4                     | 6                     | 8                     | 10                    | 12                    | ANOVA p-value |
|-------------------------------------|-----------------------|-----------------------|-----------------------|-----------------------|-----------------------|-----------------------|---------------|
| Non Act Mean<br>( $\pm$ stdev)      | 1,05<br>( $\pm$ 0,06) | 1,11<br>( $\pm$ 0,04) | 1,10<br>( $\pm$ 0,08) | 1,09<br>( $\pm$ 0,06) | 1,13<br>( $\pm$ 0,11) | 1,20<br>( $\pm$ 0,16) | 0,3776        |
| IFN $\gamma$ Mean<br>( $\pm$ stdev) | 1,06<br>( $\pm$ 0,02) | 1,16<br>( $\pm$ 0,04) | 1,35<br>( $\pm$ 0,10) | 1,77<br>( $\pm$ 0,03) | 2,26<br>( $\pm$ 0,04) | 2,79<br>( $\pm$ 0,05) | < 0,0001*     |
| IFN $\alpha$ Mean<br>( $\pm$ stdev) | 1,09<br>( $\pm$ 0,02) | 1,10<br>( $\pm$ 0,03) | 1,11<br>( $\pm$ 0,09) | 1,19<br>( $\pm$ 0,10) | 1,14<br>( $\pm$ 0,02) | 1,22<br>( $\pm$ 0,02) | 0,2456        |

(B2) nCD64 MFI

---

| IFN $\gamma$ Tukey p-value | 2         | 4         | 6         | 8         | 10        | 12        |
|----------------------------|-----------|-----------|-----------|-----------|-----------|-----------|
| 2                          | /         | 0,1212    | < 0,0001* | < 0,0001* | < 0,0001* | < 0,0001* |
| 4                          | 0,1212    | /         | 0,0011*   | < 0,0001* | < 0,0001* | < 0,0001* |
| 6                          | < 0,0001* | 0,0011*   | /         | < 0,0001* | < 0,0001* | < 0,0001* |
| 8                          | < 0,0001* | < 0,0001* | < 0,0001* | /         | < 0,0001* | < 0,0001* |
| 10                         | < 0,0001* | < 0,0001* | < 0,0001* | < 0,0001* | /         | < 0,0001* |
| 12                         | < 0,0001* | < 0,0001* | < 0,0001* | < 0,0001* | < 0,0001* | /         |

**SUPPORTING INFORMATION.**

**Supplementary Table 4. Detailed values of direct or indirect CD169 and CD64 kinetics after interferon stimulation.** *Whole blood of 8 donors was co-incubated for 2 to 24 hours at 37°C with either no interferon (Non Act), or one type II interferon (IFN $\gamma$ ) or one type I interferon (IFN $\alpha$ 1). On one hand, biomarker extracellular expressions (Extra.) were assessed in activated whole blood without Brefeldin A (Bref. A), a Golgi apparatus blocker, (supplementary table A1 and B1) or with Brefeldin A (supplementary table A2 and B2). On the other hand, intracellular expressions (Intra.) were evaluated with Brefeldin A only (supplementary table A3 and B3). All stainings were performed with the CD64-CD169/Infections antibody mixture. Results were expressed as means  $\pm$  standard deviations (stdev) of Median of Fluorescence Intensities (MFI) of CD169 on monocytes (mCD169) (supplementary tables 4A) and of CD64 on neutrophils (nCD64) (supplementary tables 4B). Comparison was made using an ANOVA test, for which p-value is considered statistically significant under 0.05 (in bold with \*).*

**(A1) mCD169 MFI (Extra. Without Bref. A)**

| <b>Time (h)</b>                                                 | <b>2</b>              | <b>4</b>              | <b>6</b>              | <b>8</b>              | <b>ANOVA p-value</b> |
|-----------------------------------------------------------------|-----------------------|-----------------------|-----------------------|-----------------------|----------------------|
| <b>Non Act Mean<br/>(<math>\pm</math> stdev)</b>                | 0,83<br>( $\pm$ 0,01) | 0,79<br>( $\pm$ 0,17) | 0,79<br>( $\pm$ 0,18) | 0,87<br>( $\pm$ 0,10) | 0,1236               |
| <b>IFN<math>\gamma</math> Mean<br/>(<math>\pm</math> stdev)</b> | 0,87<br>( $\pm$ 0,35) | 0,94<br>( $\pm$ 0,39) | 0,76<br>( $\pm$ 0,67) | 1,13<br>( $\pm$ 0,71) | 0,3641               |
| <b>IFN<math>\alpha</math> Mean<br/>(<math>\pm</math> stdev)</b> | 0,88<br>( $\pm$ 0,36) | 0,96<br>( $\pm$ 0,40) | 1,05<br>( $\pm$ 0,56) | 1,90<br>( $\pm$ 0,47) | <b>&lt; 0,0001*</b>  |

(A2) mCD169 MFI (Extra. With Bref. A)

| Time (h)                       | 2                | 4                | 6                | 8                | ANOVA p-value |
|--------------------------------|------------------|------------------|------------------|------------------|---------------|
| Non Act Mean<br>(± stdev)      | 0,87<br>(± 0,01) | 0,66<br>(± 0,17) | 0,72<br>(± 0,14) | 0,73<br>(± 0,22) | 0,7002        |
| IFN $\gamma$ Mean<br>(± stdev) | 0,86<br>(± 0,04) | 0,64<br>(± 0,13) | 0,68<br>(± 0,15) | 0,69<br>(± 0,11) | 0,5019        |
| IFN $\alpha$ Mean<br>(± stdev) | 0,83<br>(± 0,02) | 0,88<br>(± 0,29) | 0,71<br>(± 0,18) | 1,01<br>(± 0,55) | 0,3478        |

(A3) mCD169 MFI (Intra. With Bref. A)

| Time (h)                       | 2                | 4                | 6                | 8                | ANOVA p-value  |
|--------------------------------|------------------|------------------|------------------|------------------|----------------|
| Non Act Mean<br>(± stdev)      | 0,73<br>(± 0,04) | 0,54<br>(± 0,07) | 0,58<br>(± 0,12) | 0,55<br>(± 0,20) | 0,4334         |
| IFN $\gamma$ Mean<br>(± stdev) | 0,85<br>(± 0,01) | 0,63<br>(± 0,13) | 0,61<br>(± 0,11) | 0,72<br>(± 0,23) | 0,2969         |
| IFN $\alpha$ Mean<br>(± stdev) | 0,79<br>(± 0,16) | 0,98<br>(± 0,38) | 1,64<br>(± 0,51) | 2,48<br>(± 0,90) | <b>0,0010*</b> |

(B1) nCD64 (Extra. Without Bref. A)

| Time (h)                       | 2                | 4                | 6                | 8                | ANOVA p-value  |
|--------------------------------|------------------|------------------|------------------|------------------|----------------|
| Non Act Mean<br>(± stdev)      | 0,88<br>(± 0,35) | 0,69<br>(± 0,38) | 1,04<br>(± 0,54) | 0,81<br>(± 0,47) | 0,4284         |
| IFN $\gamma$ Mean<br>(± stdev) | 0,92<br>(± 0,35) | 0,84<br>(± 0,39) | 1,33<br>(± 0,67) | 1,45<br>(± 0,71) | <b>0,0002*</b> |
| IFN $\alpha$ Mean<br>(± stdev) | 0,87<br>(± 0,36) | 0,77<br>(± 0,40) | 1,10<br>(± 0,56) | 0,99<br>(± 0,47) | 0,0766         |

**(B2) nCD64 (Extra. With Bref. A)**

---

| <b>Time (h)</b>                                  | <b>2</b>         | <b>4</b>         | <b>6</b>         | <b>8</b>         | <b>ANOVA p-value</b> |
|--------------------------------------------------|------------------|------------------|------------------|------------------|----------------------|
| <b>Non Act Mean<br/>(± stdev)</b>                | 0,85<br>(± 0,37) | 0,96<br>(± 0,56) | 0,96<br>(± 0,52) | 0,95<br>(± 0,49) | 0,9222               |
| <b>IFN<math>\gamma</math> Mean<br/>(± stdev)</b> | 0,84<br>(± 0,38) | 0,96<br>(± 0,57) | 0,97<br>(± 0,53) | 1,00<br>(± 0,46) | 0,8226               |
| <b>IFN<math>\alpha</math> Mean<br/>(± stdev)</b> | 0,87<br>(± 0,37) | 0,68<br>(± 0,33) | 0,95<br>(± 0,48) | 0,75<br>(± 0,36) | 0,7568               |

**(B3) nCD64 (Intra. With Bref. A)**

---

| <b>Time (h)</b>                                  | <b>2</b>         | <b>4</b>         | <b>6</b>         | <b>8</b>         | <b>ANOVA p-value</b> |
|--------------------------------------------------|------------------|------------------|------------------|------------------|----------------------|
| <b>Non Act Mean<br/>(± stdev)</b>                | 0,66<br>(± 0,26) | 0,54<br>(± 0,27) | 0,65<br>(± 0,27) | 0,51<br>(± 0,27) | 0,7130               |
| <b>IFN<math>\gamma</math> Mean<br/>(± stdev)</b> | 0,61<br>(± 0,20) | 0,53<br>(± 0,13) | 0,90<br>(± 0,35) | 1,11<br>(± 0,34) | <b>0,0149*</b>       |
| <b>IFN<math>\alpha</math> Mean<br/>(± stdev)</b> | 0,65<br>(± 0,22) | 0,54<br>(± 0,27) | 0,66<br>(± 0,23) | 0,61<br>(± 0,24) | 0,8487               |

**SUPPORTING INFORMATION.**

**Supplementary Table 5. Detailed values of cellular actors and activation pathways after interferon stimulation.** *Whole blood of 3 donors was co-incubated for 15 minutes at 37°C with either no interferon (Non Act), or one type I interferon (IFN $\alpha$ 1) or one type II interferon (IFN $\gamma$ ). Phospho-epitope staining of the activated blood was performed with the DCs antibody mixture. Results were expressed as means  $\pm$  standard deviations (stdev) of Median of Fluorescence Intensities (MFI) of phosphorylated STAT1 (pSTAT1) (supplementary tables 5A1 to 5A4) and of pSTAT2 (supplementary tables 5B1 to 5B4) on monocytes (supplementary tables 5A1 and 5B1), neutrophils (supplementary tables 5A2 and 5B2), myeloid dendritic cells (mDCs) (supplementary tables 5A3 and 5B3) and plasmacytoid dendritic cells (pDCs) (supplementary tables 5A4 and 5B4). Comparison was made using a paired Tukey test, for which p-value was considered statistically significant under 0.05 (in bold with \*).*

| <b>(A1) pSTAT1 MFI on monocytes</b>           |                |                               |                               | <b>(B1) pSTAT2 MFI on monocytes</b>           |                |                               |                               |
|-----------------------------------------------|----------------|-------------------------------|-------------------------------|-----------------------------------------------|----------------|-------------------------------|-------------------------------|
| <b>Activator</b>                              | <b>Non Act</b> | <b>IFN<math>\alpha</math></b> | <b>IFN<math>\gamma</math></b> | <b>Activator</b>                              | <b>Non Act</b> | <b>IFN<math>\alpha</math></b> | <b>IFN<math>\gamma</math></b> |
| <b>Mean</b>                                   | 1,88           | 42,66                         | 41,92                         | <b>Mean</b>                                   | 0,94           | 4,22                          | 0,67                          |
| <b>(<math>\pm</math> stdev)</b>               | ( $\pm$ 0,16)  | ( $\pm$ 1,16)                 | ( $\pm$ 7,34)                 | <b>(<math>\pm</math> stdev)</b>               | ( $\pm$ 0,23)  | ( $\pm$ 0,54)                 | ( $\pm$ 0,19)                 |
| <b>Tukey p-value<br/>Activator vs Non Act</b> | /              | <b>0,0027*</b>                | <b>0,0030*</b>                | <b>Tukey p-value<br/>Activator vs Non Act</b> | /              | <b>0,0032*</b>                | 0,8894                        |

**(A2) pSTAT1 MFI on neutrophils**

| Activator                                    | Non Act               | IFN $\alpha$           | IFN $\gamma$           |
|----------------------------------------------|-----------------------|------------------------|------------------------|
| <b>Mean</b><br>( $\pm$ stdev)                | 2,00<br>( $\pm$ 0,20) | 10,24<br>( $\pm$ 0,49) | 12,45<br>( $\pm$ 0,76) |
| <b>Tukey p-value</b><br>Activator vs Non Act | /                     | <b>0,0002*</b>         | <b>&lt; 0,0001*</b>    |

**(B2) pSTAT2 MFI on neutrophils**

| Activator                                    | Non Act               | IFN $\alpha$          | IFN $\gamma$          |
|----------------------------------------------|-----------------------|-----------------------|-----------------------|
| <b>Mean</b><br>( $\pm$ stdev)                | 0,79<br>( $\pm$ 0,21) | 3,50<br>( $\pm$ 0,87) | 0,62<br>( $\pm$ 0,15) |
| <b>Tukey p-value</b><br>Activator vs Non Act | /                     | <b>0,0441*</b>        | 0,9786                |

**(A3) pSTAT1 MFI on mDCs**

| Activator                                    | Non Act               | IFN $\alpha$           | IFN $\gamma$            |
|----------------------------------------------|-----------------------|------------------------|-------------------------|
| <b>Mean</b><br>( $\pm$ stdev)                | 2,66<br>( $\pm$ 0,42) | 48,01<br>( $\pm$ 5,80) | 49,40<br>( $\pm$ 12,92) |
| <b>Tukey p-value</b><br>Activator vs Non Act | /                     | <b>0,0337*</b>         | <b>0,0297*</b>          |

**(B3) pSTAT2 MFI on mDCs**

| Activator                                    | Non Act               | IFN $\alpha$          | IFN $\gamma$          |
|----------------------------------------------|-----------------------|-----------------------|-----------------------|
| <b>Mean</b><br>( $\pm$ stdev)                | 0,57<br>( $\pm$ 0,12) | 2,31<br>( $\pm$ 0,60) | 0,37<br>( $\pm$ 0,06) |
| <b>Tukey p-value</b><br>Activator vs Non Act | /                     | <b>0,0435*</b>        | 0,9387                |

**(A4) pSTAT1 MFI on pDCs**

| Activator                                    | Non Act               | IFN $\alpha$           | IFN $\gamma$          |
|----------------------------------------------|-----------------------|------------------------|-----------------------|
| <b>Mean</b><br>( $\pm$ stdev)                | 1,00<br>( $\pm$ 0,15) | 24,36<br>( $\pm$ 7,97) | 5,93<br>( $\pm$ 1,48) |
| <b>Tukey p-value</b><br>Activator vs Non Act | /                     | <b>0,0406*</b>         | 0,8013                |

**(B4) pSTAT2 MFI on pDCs**

| Activator                                    | Non Act               | IFN $\alpha$          | IFN $\gamma$          |
|----------------------------------------------|-----------------------|-----------------------|-----------------------|
| <b>Mean</b><br>( $\pm$ stdev)                | 0,73<br>( $\pm$ 0,18) | 3,43<br>( $\pm$ 0,35) | 0,72<br>( $\pm$ 0,21) |
| <b>Tukey p-value</b><br>Activator vs Non Act | /                     | <b>0,0016*</b>        | 0,9999                |



**SUPPORTING INFORMATION.**

**Supplementary Table 6. Detailed values of combined effects of interferons on CD169 and CD64 expressions.** Whole blood of 6 donors was co-incubated for 18 hours at 37°C with either no interferon (Non Act), or one type I interferon (IFN $\alpha$ 1) or one type II interferon (IFN $\gamma$ ) or a combination of both interferons (IFN $\alpha$ 1+IFN $\gamma$ ). Extracellular staining of the activated blood was performed with the CD64-CD169/Infections antibody mixture. Results were expressed as means  $\pm$  standard deviations (stdev) of Median of Fluorescence Intensities (MFI) of CD169 on monocytes (mCD169) (supplementary table 6A) and of CD64 on neutrophils (nCD64) (supplementary table 6B). Comparison was made using a paired Tukey test, for which p-value was considered statistically significant under 0.05 (in bold with \*).

| <b>(A) mCD169 MFI</b>                                    |                       |                               |                               |                                                      |
|----------------------------------------------------------|-----------------------|-------------------------------|-------------------------------|------------------------------------------------------|
| <b>Activator</b>                                         | <b>Non Act</b>        | <b>IFN<math>\alpha</math></b> | <b>IFN<math>\gamma</math></b> | <b>IFN<math>\alpha</math>+IFN<math>\gamma</math></b> |
| <b>Mean<br/>(<math>\pm</math> stdev)</b>                 | 0,99<br>( $\pm$ 0,23) | 4,42<br>( $\pm$ 1,23)         | 0,94<br>( $\pm$ 0,25)         | 3,37<br>( $\pm$ 0,86)                                |
| <b>Tukey p-value Activator vs Non Act</b>                | /                     | <b>&lt; 0,0001*</b>           | 0,9996                        | <b>0,0002*</b>                                       |
| <b>Tukey p-value Activator vs IFN<math>\alpha</math></b> | <b>&lt; 0,0001*</b>   | /                             | <b>&lt; 0,0001*</b>           | 0,1154                                               |
| <b>(B) nCD64 MFI</b>                                     |                       |                               |                               |                                                      |
| <b>Activator</b>                                         | <b>Non Act</b>        | <b>IFN<math>\alpha</math></b> | <b>IFN<math>\gamma</math></b> | <b>IFN<math>\alpha</math>+IFN<math>\gamma</math></b> |
| <b>Mean<br/>(<math>\pm</math> stdev)</b>                 | 0,76<br>( $\pm$ 0,24) | 1,04<br>( $\pm$ 0,28)         | 2,41<br>( $\pm$ 1,13)         | 1,53<br>( $\pm$ 0,61)                                |
| <b>Tukey p-value Activator vs Non Act</b>                | /                     | 0,8858                        | <b>0,0019*</b>                | 0,2184                                               |
| <b>Tukey p-value Activator vs IFN<math>\gamma</math></b> | <b>0,0019*</b>        | <b>0,0096*</b>                | /                             | 0,1355                                               |
